# Supplementary material for: Label-free, high-throughput holographic screening and enumeration of tumor cells in blood
Source: Royal Society of Chemistry journal article supplement (doi:10.1039/c7lc00149e), 2017-01-01
Supplement: c7lc00149e1.pdf [file c7lc00149e1.pdf]

## Label-free, high-throughput holographic screening and enumeration of tumor cells in blood

Dhananjay Kumar Singh<sup>§</sup>, Caroline C. Ahrens<sup>§</sup>, Wei Li, Siva A. Vanapalli\*

Department of Chemical Engineering, Texas Tech University, Lubbock, Texas, USA

<sup>§</sup>Equal author contribution

\*Corresponding author: [siva.vanapalli@ttu.edu](mailto:siva.vanapalli@ttu.edu)

### SUPPLEMENTARY INFORMATION

**Table SM1:** A comparison of minimum detectable spike in amount to non-spiked detection is presented. The concentration of spiked tumor cells is targeted to be 10, 50, and 100 cells/mL of MCF7 and MDA-MB-231 each. The classification strategy corresponding to MCF7 and MDA-MB-231 has also implemented to non-spiked concentration (i.e.  $C = 0$  cells/mL) to suggest a minimum detection limit. The total analyzed sample volume and number of cells (tumor cells + PBMCs) is 1 mL and 450,000 respectively.

| Cell Line | Input Concentration (Cells/mL) | Spiked Cancer Cells in PBMCs from Donor 1 |       |       |       |                    |
|-----------|--------------------------------|-------------------------------------------|-------|-------|-------|--------------------|
|           |                                | $n_1$                                     | $n_2$ | $n_3$ | Mean  | Standard deviation |
| MCF7      | 0                              | 0                                         | -     | -     | 0     | 0                  |
|           | 10                             | 17                                        | 4     | 18    | 13    | 8                  |
|           | 50                             | 17                                        | 63    | 10    | 30    | 29                 |
|           | 100                            | 67                                        | 73    | 113   | 84    | 25                 |
| MDA-MB231 | 0                              | 6                                         | -     | -     | 0     | 0                  |
|           | 10                             | 21                                        | 26    | 2     | 16.33 | 12.66              |
|           | 50                             | 59                                        | 8     | 63    | 43    | 31                 |
|           | 100                            | 123                                       | 146   | 61    | 110   | 44                 |

**Table SM2:** The detection of tumor cells in lysed blood of three different donors in non-spiked condition is presented. The classification strategy corresponding to MCF7 and MDA-MB-231 has been implemented to non-spiked concentration (i.e.  $C = 0$  cells/mL) to suggest a minimum detection limit. The total analyzed sample volume and number of cells (tumor cells + PBMCs) is 1 mL and 450,000 respectively.

| Cell Line | Input Concentration (Cells/mL) | Donor-1 | Donor-2 | Donor-3 | Mean | Standard deviation |
|-----------|--------------------------------|---------|---------|---------|------|--------------------|
| MCF7      | 0                              | 0       | 3       | 1       | 1.33 | 1.5                |
| MDA-MB231 | 0                              | 6       | 3       | 0       | 3    | 3                  |

### **Protocol adopted to obtain low concentration of spiked tumor cells**

PBMCs were isolated from whole blood using ACK Lysing Buffer following manufacturer protocol. Suspensions of blood components were filtered with a 30  $\mu\text{m}$  filter and diluted in PBS to a final concentration 0.45 million cells/mL. Adherent tumor cell lines, MDA-MB-231 and MCF-7, were cultured to 60-80% confluence, trypsinized using standard protocols, resuspended in PBS (1 million cells/ml), and serially diluted to 1000 cells/mL. For both MD-MBA-231 and MCF 7 samples, cancer cell suspensions were spiked in technical triplicate into PBMC suspensions (2 mL) at 20, 100 and 200  $\mu\text{L}$  cancer cell suspension for target concentrations of 10, 50 and 100 cancer cells per mL. Finally, 1 mL of sample was analyzed corresponding to each data point. The counting of cells was performed by hemocytometer.
